# Supplementary material
Source: Springer Nature journal article supplement (https://www.springerprofessional.de/resource/supplementary/40294_2012_21_MOESM9_ESM.pdf/11899520)

Effect of geographic distribution on network characteristics  
(95% Confidence Interval)

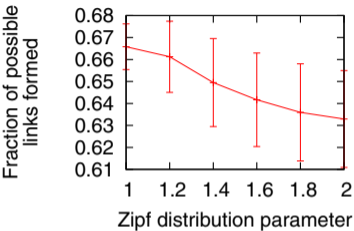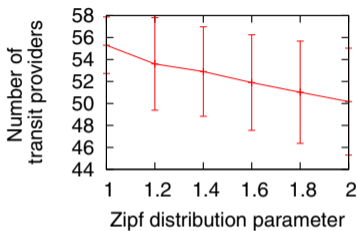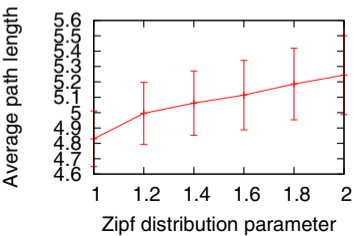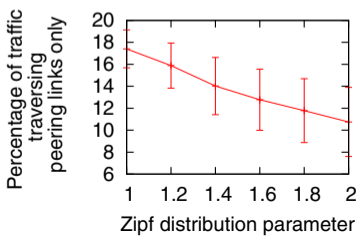

Supplement: MOESM9 [file 11899520]
